# Supplementary material for: Extreme Diversity in the Regulation of Ndt80-Like Transcription Factors in Fungi
Source: PubMed Central journal article supplement (PMC4683649; doi:10.1534/g3.115.021378), 2015-10-22
Supplement: supp_g3.115.021378_FigureS1.pdf [file supp_g3.115.021378_FigureS1.pdf]

```

Ime2 : MVEKRSRQSSSS-----GSEFS-----VPPDVDPPLSIPKLTLSDRVQLTEKLCAGSFGCVTLAAQFPPLSNILGKHDIRGLTMDQPKNG : 82
ImeB : -----MTVICY-----EHPSTRGLTPTSMATLSDRRELKRVGDSFGSVAVAVRRTAGSNIARR----- : 53
MpkC : -----MAEET-----RSDILGTFETTSRANQPVELGTAGVVCASAYDLIS----- : 42
PhoA : MTSQRPTSSSSSLLDIVANLASPKSLFNAAHTNPPSPLSQRAPTMDKSQQPSSSQOLEKLCAGTYATVFKGNNROT----- : 78
PhoB : -----MPRYL-----AVPPRRPLPVPRDDEHLA-----LRQVYKGNCO----- : 36

Ime2 : HQNYITKTCQVVAIKTMMTKLHLDQYTRVREIKFLLAIPANDHITQIFEVFIDSENYQLEHIMCEQONTYQMKKH-----RRRVFSIPSLKKSILSQTLAG : 180
ImeB : -----GTLVAIKTKKTFDSLAPCLE-----REVLFLLTLPPEHLVLPALIFLDPLTRKHEHAMFMDGNTYQLMKA-----DHKYDGKHVKSILYQITLGC : 143
MpkC : -----EQVVAIKMKPFHSTSVAKRTYREVKLLHLR-----DNLINSLIFISPLE-DVYLVTELLCTDLHRLNG-----PESKFAQYFTYQITLGC : 128
PhoA : -----GELVALKEHLDSEEGTPSTA-----REISLMEELK-----ESIVSYVIVHTEN-KMLLPEYMDKDLKKYMDTGDGRGQDOATIKSFMHQLMSSC : 166
PhoB : -----GEMVALKEHLDSEEGTPSTA-----REISLMEELH-----DNLISLYVIVHTEN-KMLLPEYMDKDLKKYMDTHGNHGQEPATVKSFAFQITLGC : 124

Ime2 : LKHHIEHNHFHRDLKPNILITPST-----QYFEKEYMNQIGYQDNYVILADDFGLARHVENKNP-----YAVVSTRWYRSEELLRSQYVSKPLDIWAFGLV : 274
ImeB : LDHIEAHHFHRDLKPNILVSTAPNDSTFSRYSNLVTPPSTPTTYVVKIADDFGLARETHSKLP-----YTVVSTRWYRSEVLLRAGEVSAQVDMMAVGCAM : 242
MpkC : LKYIHSAGVHHRDLKPNLLINENC-----DLKIDDFGLAR-----VQEPQMGYVSTRYRPEHMLTWQRYGSGVLDLMSVGI : 203
PhoA : IAFCHDNRIHHRDLKPNLLINCKG-----QKLDLDFGLARAFGIPVNT-----SNEVVLWYRPEVLLGSRTYNTSIDWISAGIT : 244
PhoB : IAFCHDNRIHHRDLKPNLLINCKG-----QKLDLDFGLARAFGIPVNT-----SNEVVLWYRPEVLLGSRTYNTSIDWISAGIT : 202

Ime2 : AVEVTVPRALFPGCANEIDQIWLLEVLGTHIKRSDVFNTHITAPPGGPDDASNLVHRLNKLKLYVEGSSLDHLLSSSQ-----LSDLSEVKKQLRWDFN : 372
ImeB : AVEVATLRLFPGCNEVDQIWLVEIMGSPGNWY-----SKSGAKLGGGEKDGSRLLAOKLGFTEPKMAPHSMESTLAPQWPAALSFWTWGLMMDK : 336
MpkC : LAEMLLGRPLFPCTDHIQFWLITDLLGNPDEV-----IDRIITNNTFRVVKSMKRNRPRPKETLAAE-DAAL-----NIDNLLVDFED : 285
PhoA : MAELVTCRPLFPCTDHIQFWLITDLLGNPDEV-----PGISQLEPYRAN-----FHVYATQDGLITLQID-PLGL-----DILNRMQLQRE : 324
PhoB : IAEMTCRPLFPCTDHIQFWLITDLLGNPDEV-----PGVSPPEYRSD-----FPVYVPPQDLRQVWRID-PYGL-----DILRCMLRQED : 282

Ime2 : ERATVQELCEMPEFENTIVAS----- : 392
ImeB : NRPVSSQAVQVPEADAVDLSVPRRSSTARLLGRKQSEKSVKSPKTDYESTLSSKPSWFRRLSIGRSESPALVEPEQPSKPTLPALDSNVDPQLKLP : 436
MpkC : RRSVSEQMHWMPYHDB----- : 305
PhoA : MRIDHGAQHWHLPLQL----- : 344
PhoB : LRSVVDARHWNPVSD----- : 302

Ime2 : ----- : 520
ImeB : KHSTSKRATWAHGAMPILPISRVPVSPLSNAVTAQANPPAQESNTNAAKSSKKIGRQLSVNSHGNYGDVHRQEAERALNGLGNNSTSTISQKESFFSHL : 536
MpkC : ----- : -
PhoA : ----- : -
PhoB : ----- : -

Ime2 : TKLPAETESNDIDISNDHDHSHAMCSPTLNQEKITVFEFLNEFVEEDNDHDSIPD-----VGTDSITSDSIDETELSKIEIRNNLALC : 509
ImeB : RKRARRLSGRNQANMNDIEANAGCQMPWSNRSSAIDSVNVSEAKQNSDFSELDKAVQNVRYSMDSALGNVPVSIITPVEASKRQSMFQSGSIRSMGDSF : 636
MpkC : -----TDEPVATEQFDWDFNDADPDTWKIMYSEVLDFFOLT-----NAEPPSGE----- : 352
PhoA : ----- : -
PhoB : -----PDDH----- : 307

Ime2 : QLPDEVLHDLSNIRQLTNDIEIINKDEADNMEQLFPDLEIPEKDEFQRKQPFNEHADIDEDIVLPIVNNNSNYHTDRSHHRGDNVLDASLGDSPNSM : 609
ImeB : ASMNNGGSPISSTRRAMQMTNHPVHRVETPEEDELDELVLHASSAAMRLAQAGMSDTSNYSRPLCNEQSHNLPSPIPTPSPSACKDGVSPFNEDAA : 736
MpkC : -----QSONQSQSQSQAFSSQDLQLASMLNL-----EGELL : 385
PhoA : -----QAQLQQQQA-----YGGMM : 360
PhoB : -----MEALT : 313

Ime2 : DFETPRNFLIPTLKKSRKFEFPHLSNSNQHFGNVTF----- : 645
ImeB : NRRRLPLSDEKSATSATRQWPTPPYDDGDWMMNPASTKFLTGSTYR : 781
MpkC : PDFA-----ATIDPNKFGSDVYLDMDGQSLDPSFS----- : 415
PhoA : P-----PQQAY----- : 366
PhoB : ----- : -

```

**Figure S1** Alignment of the amino acid sequence of *S. cerevisiae* Ime2 (SGD, <http://www.yeastgenome.org/>) with the sequences of *A. nidulans* ImeB, MpkC, PhoA and PhoB (AspGD, <http://www.aspgd.org/>). Amino acids that are conserved in all five proteins are shaded in black, in at least four of the proteins in dark grey and in at least two of the proteins in light grey. The alignment was generated with the MUSCLE (Edgar 2004) and the GeneDoc (Nicholas *et al.* 1997) computer programs.
