# Supplementary material for: Extreme Diversity in the Regulation of Ndt80-Like Transcription Factors in Fungi
Source: PubMed Central journal article supplement (PMC4683649; doi:10.1534/g3.115.021378), 2015-10-22
Supplement: supp_g3.115.021378_FigureS3.pdf [file supp_g3.115.021378_FigureS3.pdf]

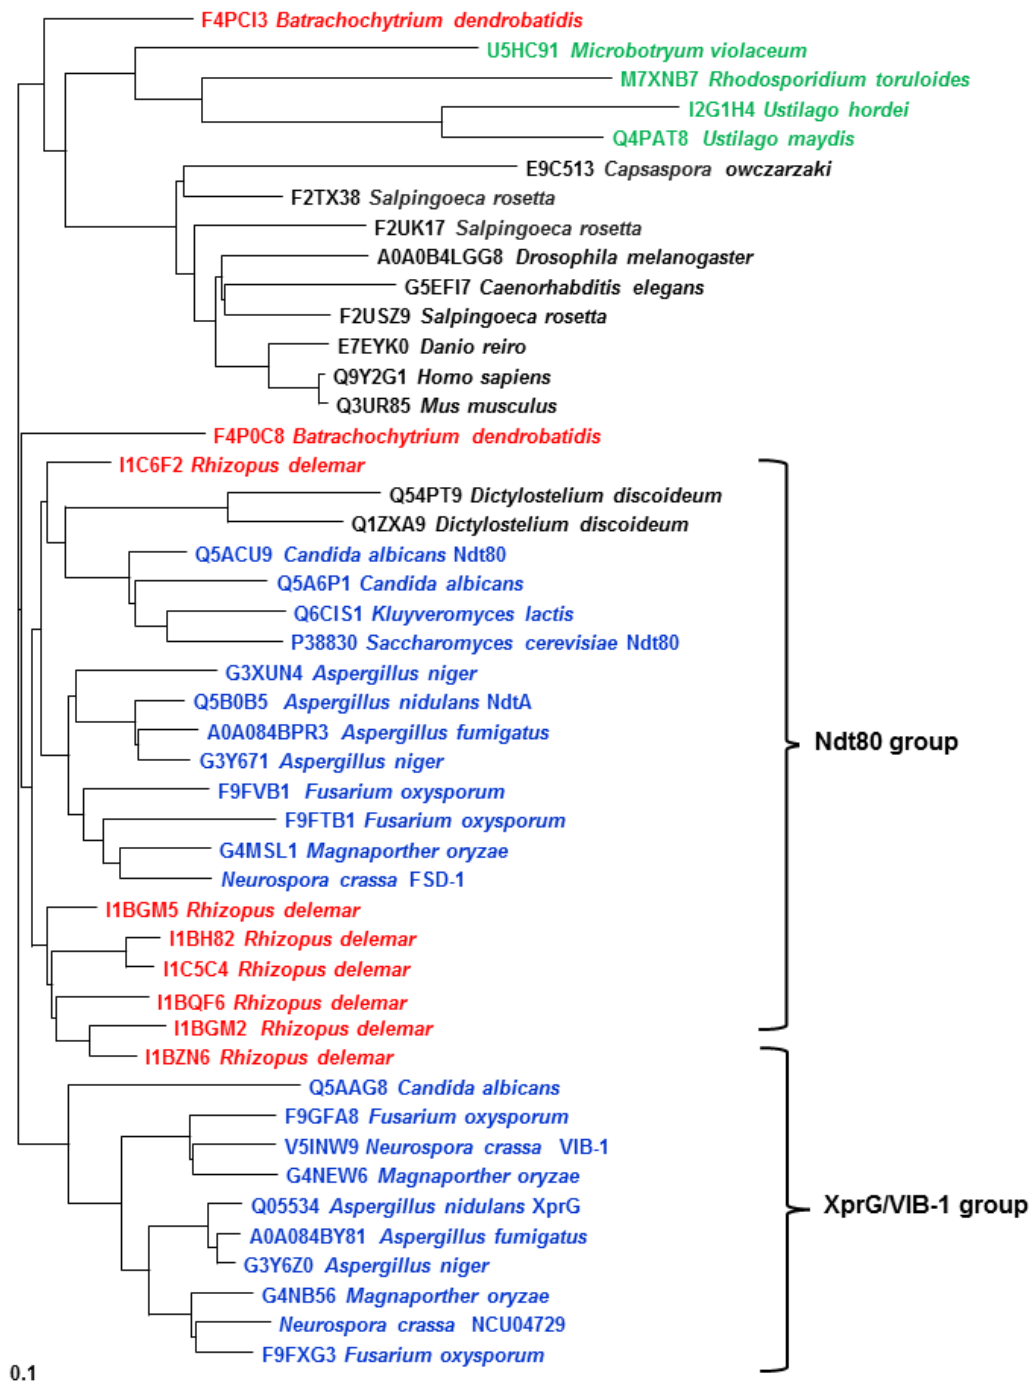

**Figure S3** Phylogenetic tree of Ndt80-like proteins from selected fungi, animals and a slime mold. Sequences from ascomycete fungi are in blue, basidiomycete 41

fungi in green and other fungi in red. All sequences, with the exception of those from *N. crassa* are from the InterPro database ([www.ebi.ac.uk/interpro/entry/IPR024061/taxonomy](http://www.ebi.ac.uk/interpro/entry/IPR024061/taxonomy)) and the accession numbers are given. The *N. crassa* sequences are from the *Neurospora crassa* database ([www.broadinstitute.org/annotation/genome/neurospora/MultiHome.html](http://www.broadinstitute.org/annotation/genome/neurospora/MultiHome.html)). The alignment was generated with the MUSCLE (Edgar 2004) and ClustalW Phylogeny (Larkin *et al.* 2007) computer programs.
