# Supplementary material for: Extreme Diversity in the Regulation of Ndt80-Like Transcription Factors in Fungi
Source: PubMed Central journal article supplement (PMC4683649; doi:10.1534/g3.115.021378), 2015-10-22
Supplement: supp_g3.115.021378_TableS1.pdf [file supp_g3.115.021378_TableS1.pdf]

**Table S1 Oligonucleotides used in qRT-PCR and screening mutants.**

| Gene                      | Primer name | Oligonucleotide sequence <sup>a</sup> | Position <sup>b</sup> | Purpose                         |
|---------------------------|-------------|---------------------------------------|-----------------------|---------------------------------|
| <i>actA</i>               | MK415       | 5'-AGAGGAAGTTGCTGCTCTCG-3' (F)        | 6                     | qRT-PCR                         |
|                           | MK416       | 5'-GGATACCACGCTTGGACTGT-3' (R)        | 193                   |                                 |
| <i>chiB</i>               | MK421       | 5'-ACGATCAGCAGGCTCAGAAC-3' (F)        | 425                   | qRT-PCR                         |
|                           | MK422       | 5'-TCTCCTGTAGCCGGAGCTTA-3' (R)        | 568                   |                                 |
| <i>ndtA</i>               | MK444       | 5'-CTGGCATGAGTTTCGACAGA-3' (F)        | 65                    | qRT-PCR                         |
|                           | MK445       | 5'-TATCGCTGAGGGGTGTCAAT-3' (R)        | 262                   |                                 |
| <i>ppgA</i>               | MK427       | 5'-TGCCGCTGAATTACAACATC-3' (F)        | 66                    | qRT-PCR                         |
|                           | MK428       | 5'-CGGAACCTGCACCATCTATT-3' (R)        | 212                   |                                 |
| <i>xprG</i>               | MK442       | 5'-GGAATATGCAGGGCACAGAT-3' (F)        | 56                    | qRT-PCR                         |
|                           | MK443       | 5'-TGGAGATAGATGGGCAAAGG-3' (R)        | 180                   |                                 |
| <i>phoA</i>               | MK375       | 5'-TACTTCCATGAGTTCGCGAC-3' (F)        | -491                  | Detection of                    |
| <i>pyroA<sup>Af</sup></i> | MK323       | 5'-GATGGTCTCGAACTGACCTT-3' (R)        | -474                  | <i>phoA::pyroA<sup>Af</sup></i> |
| <i>phoB</i>               | MK434       | 5'-GCTTTAGCTTCACCTTCAGC-3' (F)        | -328                  | Detection of                    |
| <i>pyrG<sup>Af</sup></i>  | MK431       | 5'-CACCGTAAGTCAATTGCGAC-3' (R)        | 31                    | <i>phoB::pyrG<sup>Af</sup></i>  |
| <i>mpkC</i>               | MK432       | 5'-CTGGCATTGTAATCCGCCAA-3' (F)        | -1111                 | Detection of                    |
| <i>pyrG<sup>Af</sup></i>  | MK431       | 5'-CACCGTAAGTCAATTGCGAC-3' (R)        | 31                    | <i>mpkC::pyrG<sup>Af</sup></i>  |

<sup>a</sup>The sequences labeled (R) are complementary to the sense strand.

<sup>b</sup>The position of the 5' end of each primer in the coding region of the gene (excluding introns) is given. The sequences were obtained from the *Aspergillus* Genome Database (<http://www.aspgd.org/>).
